# Supplementary material
Source: PubMed Central journal article supplement (PMC4201128)
Supplement: supp_114.056945_Supplemental_data_56945.pdf [file supp_114.056945_Supplemental_data_56945.pdf]

## Supplemental data

Authors: John Powell, Taleah Farasyn, Kathleen Köck, Xiaojie Meng, Sonia Pahwa, Kim L. R. Brouwer and Wei Yue

Title: Novel Mechanism of Impaired Function of Organic Anion Transporting Polypeptide (OATP) 1B3 in Human Hepatocytes: Post-translational Regulation of OATP1B3 by Protein Kinase C Activation

Journal: Drug Metabolism and Disposition

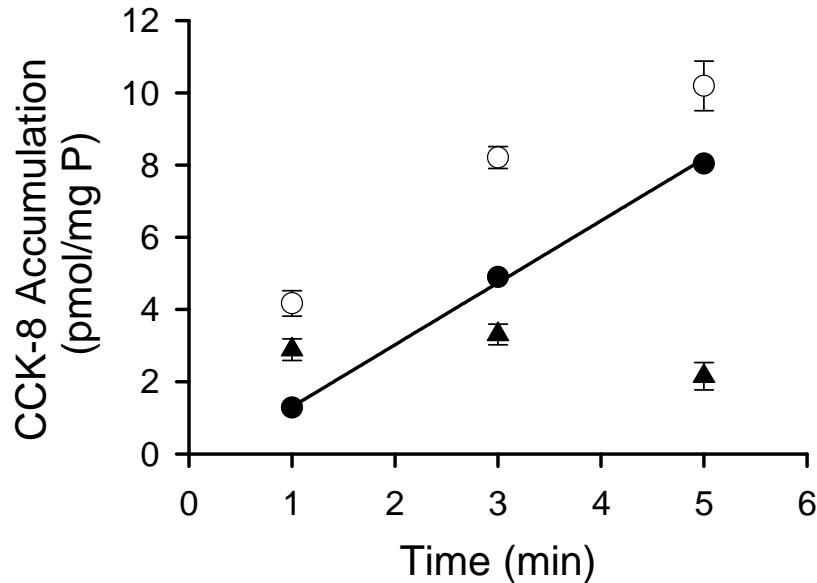

S1. Time dependent [<sup>3</sup>H]CCK-8 accumulation (1  $\mu$ M) at 37°C and 4°C in HEK293-OATP1B3 stable cell line. OATP1B3-mediated active transport (closed circles) was determined by subtracting [<sup>3</sup>H]CCK-8 accumulation at 4°C (closed triangles) from the values at 37°C (open circles). Data represent mean  $\pm$  S.D. in triplicate from one experiment.

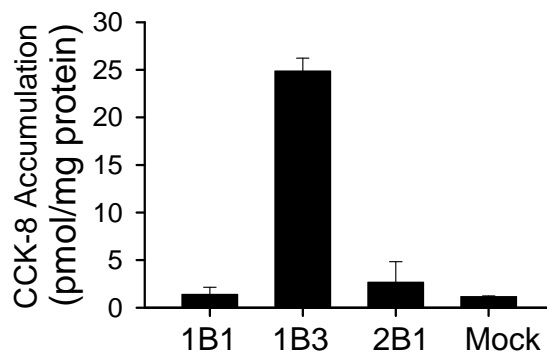

S2. CCK-8 is specifically transported by OATP1B3 but not by OATP1B1 or OATP2B1. [<sup>3</sup>H]CCK-8 uptake (1  $\mu$ M, 3 min) was determined in HEK293 cells transiently transfected with pcDNA3.1-OATP1B1, -1B3, -2B1 as well as pcDNA3.1 (Mock) by Lipofectamine 2000. Data represent mean  $\pm$  S.D. in triplicate from one experiment.
